# Supplementary material for: Fluctuating nanofluid environments induce prebiotic condensation in water
Source: Research Square preprint supplement (doi:10.21203/rs.3.rs-1301270/v2), 2022-02-23
Supplement: Supplementary file 1 [file 8ac9c987d7348f18d3c1ca2c.docx]

*Supplementary Information*

**Fluctuating nanofluid environments induce prebiotic RNA formation in water**

A. Greiner de Herrera1,2,3, T. Markert4 & F. Trixler*1,3,5

1 Department of Earth and Environmental Sciences, Ludwig-Maximilians-Universität München, Theresienstraße 41, 80333 Munich, Germany.

2 Center for Neuropathology and Prion Research (ZNP), Ludwig-Maximilians-Universität München, Feodor-Lynen-Str. 23, 81377 Munich, Germany.

3 School of Education, Technical University of Munich and Deutsches Museum, Museumsinsel 1, 80538 Munich, Germany.

4 Institute of Theoretical Chemistry, Ulm University, Albert-Einstein-Allee 11, 89081 Ulm, Germany.

5 Center for NanoScience (CeNS), Ludwig-Maximilians-Universität München, Schellingtr. 4, 80799 Munich, Germany.

* Corresponding Author. E-mail: trixler@lrz.uni-muenchen.de


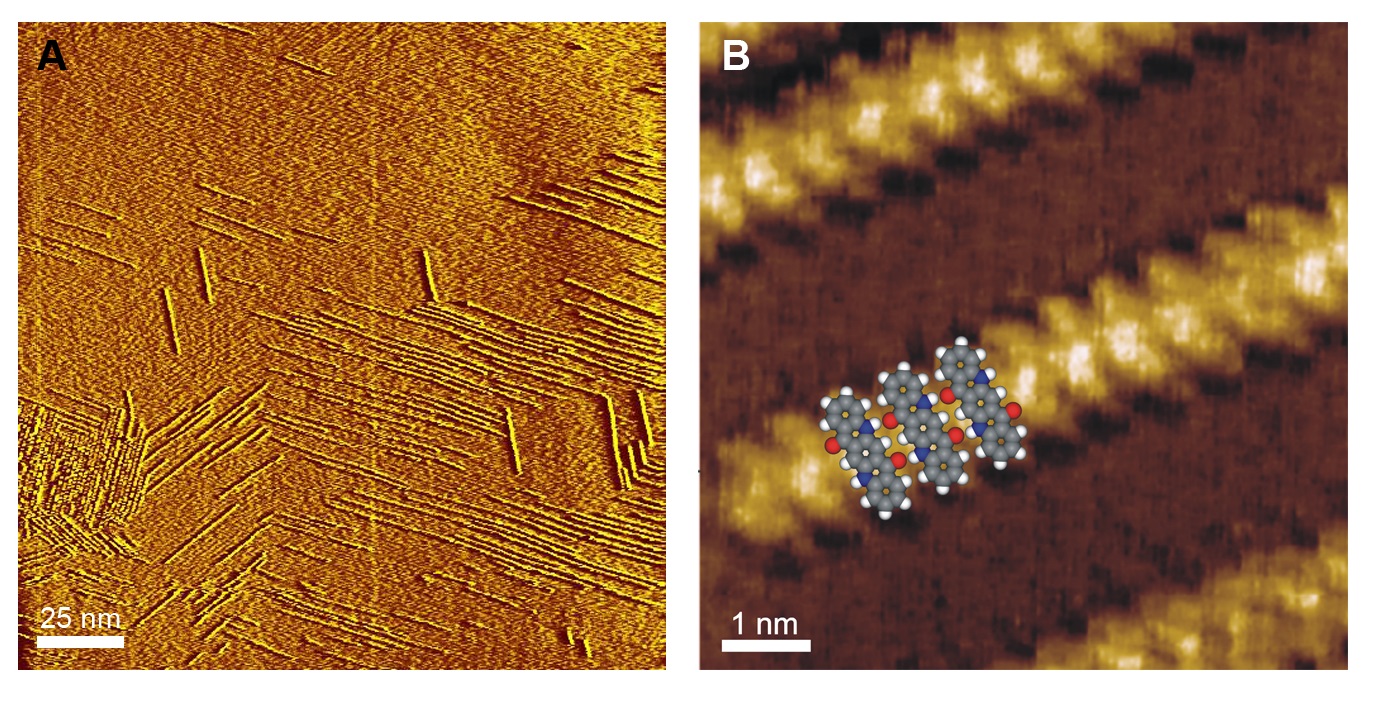
**Supplementary Fig. 1** STM images of a graphite surface after OSWD processing. **A**, Chain-like supramolecular adsorbate structures formed via OSWD after the graphite surface contacts suspensions of QAC particles. **B,** Close-up view of a single supramolecular QAC adsorbate chain superimposed by a force field calculated assembly of three QAC molecules forming a linear chain via H-bonds.


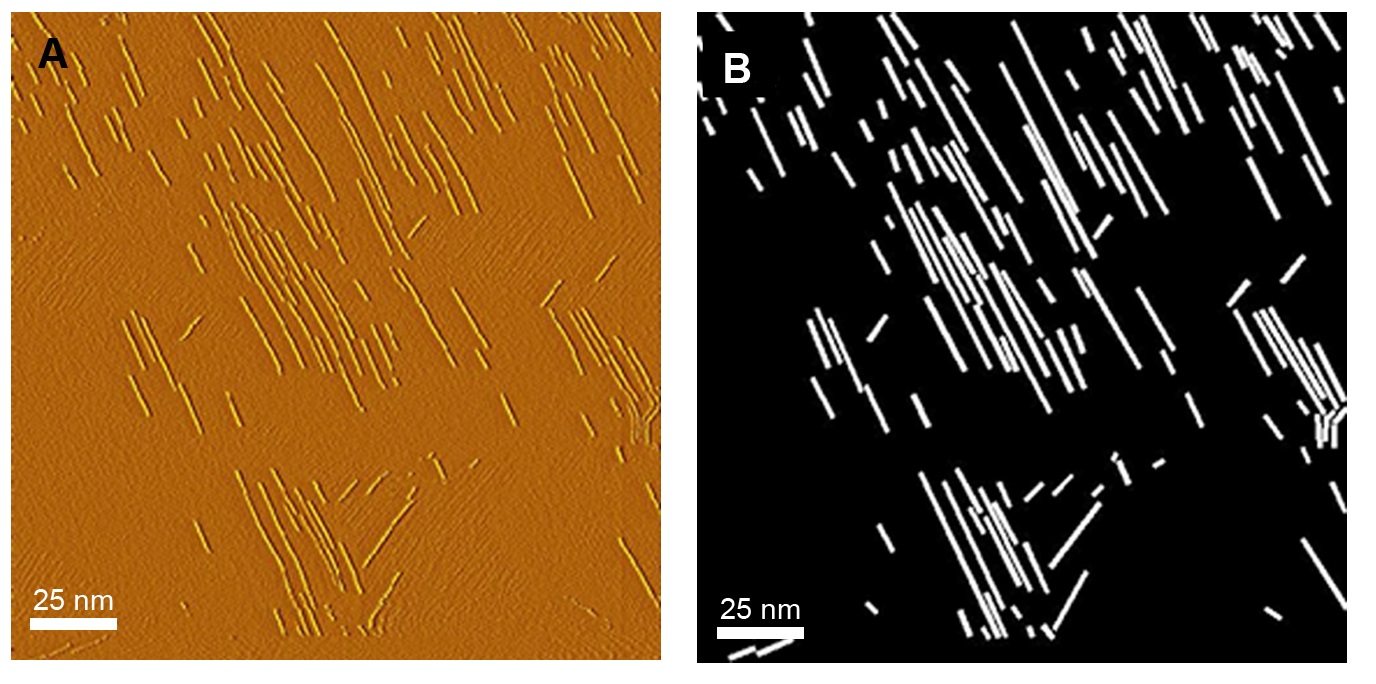
**Supplementary Fig. 2** Example of a black/white conversion of STM images for coverage analysis. **A**, STM image of chain-like QAC assemblies on graphite. **B**, Black/white conversion of the STM image: QAC chains were masked out (white) and the background was set to black. The percentage of the white proportion (the QAC coverage) was subsequently calculated as described in the methods section.


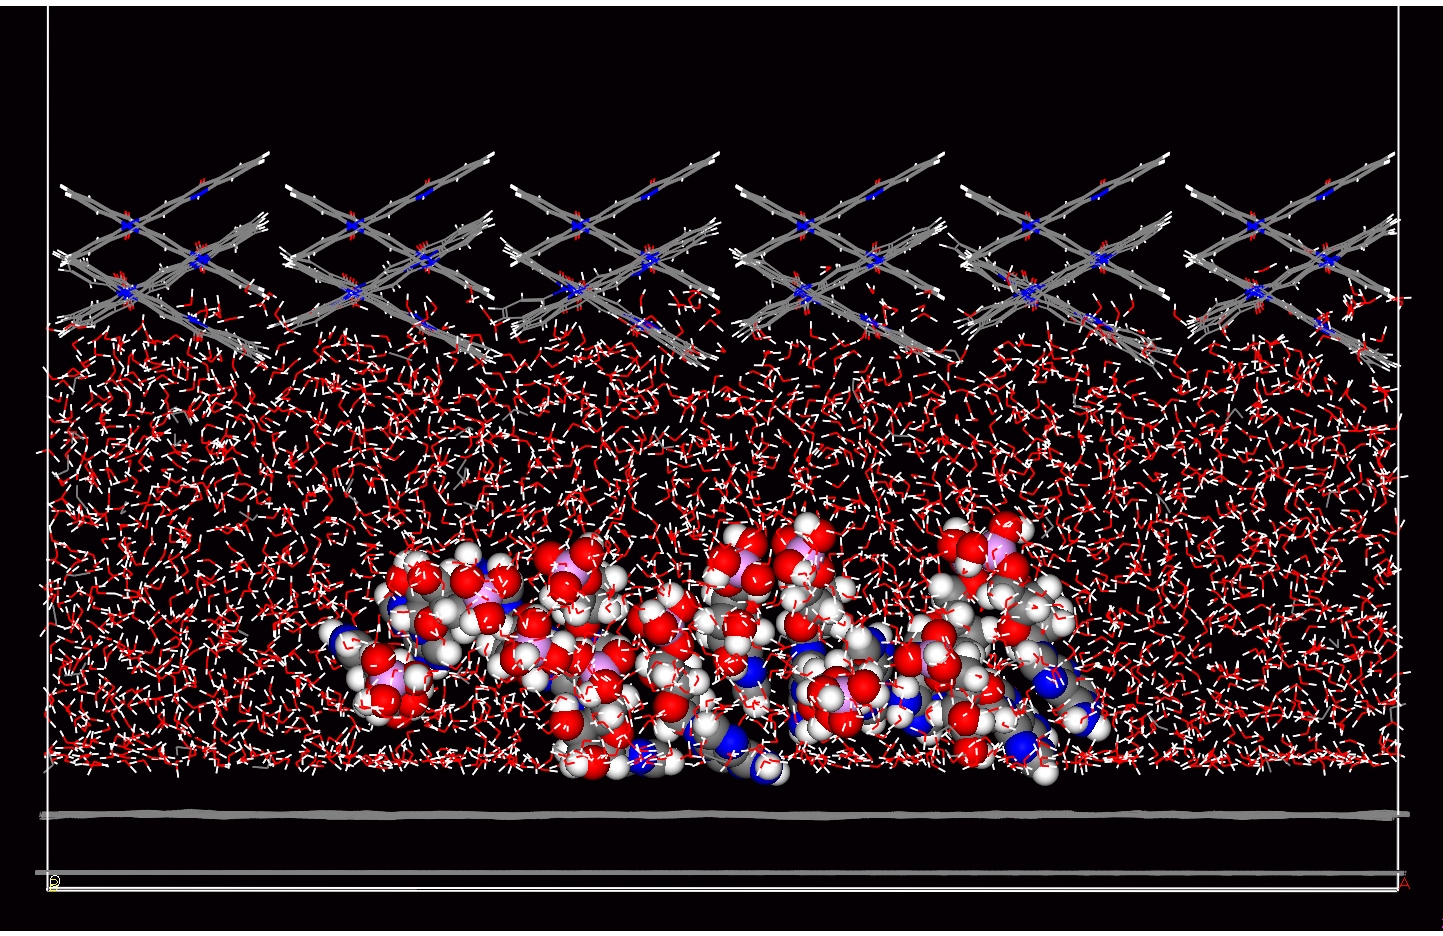
**Supplementary Fig. 3** Dynamic force field calculation of an AMP stack within nanoconfined water. The simulation was modelled with a reduced confinement gap size of 2.6 nm between a QAC crystal (top) and a graphene layer (bottom). Displayed is the condition of the stack after a simulated time span of 60 ps, revealing a stack in destabilised, non-ordered condition.

**Supplementary Movie 1** Simulation of an AMP stack within a confinement filled with water. Simulated via dynamic force field calculation is a supramolecular stack of 12 AMPs confined between a QAC crystal (top) and a graphene layer (bottom). A gap of 43 Å separates these confining surfaces and is filled with water. The simulation represents a time span of 50 ps, and the final state of the stack at the end of the simulation is depicted in Fig. 4a.

**Supplementary Movie 2** Simulation of an AMP stack within a confinement with a water density reduced to approximately 60%. The dynamic force field calculation simulates a supramolecular stack of 12 AMPs assembled in nanoconfined water. The modelling parameters are identical to those in Supplementary Video 1 with the exception of water density. The simulation represents a time span of 60 ps. The final configuration is shown in Fig. 4b.
